# Supplementary material for: Bottom-up and top-down neural signatures of disordered multi-talker speech perception in adults with normal hearing
Source: eLife. 2020 Jan 21;9:e51419. doi: 10.7554/eLife.51419 (PMC6974362; doi:10.7554/eLife.51419)
Supplement: Figure 1—figure supplement 2—source data 1. [file elife-51419-fig1-figsupp2-data1.xlsx]

## Sheet: Sheet1
	S001	S002	S003	S006	S007	S008	S009	S010	S011	S012	S013	S014	S015	S016	S017	S018	S019	S020	S021	S022	S023	S025	S027
Speech-in-Noise measure
Digits threshold (SNR)	3.4898	2.7551	0.918367	1.10204	0	0	5.32653	4.56	0	2.38776	3.67347	6.42857	3.67347	3.4898	0.734694	4.77551	0.734694	0	1.65306	2.02041	4.40816	2.7551	0.918367
Noise Exposure Questionnaire
NEQ	68.7745	68.6868	73.6497	77.5189	69.3449	65.9667	70.196	72.387	76.4822	74.1705	72.6031	67.6855	65.5779	67.9801	66.6935	66.6935	71.3117	65.806	65.9667	63.7036	71.9803	71.6244	71.0694
High frequency audiometry
HF Audiogram	NaN	10.8333	NaN	24.1667	11.6667	-0.833333	20	14.1667	-3.33333	13.3333	-5	14.1667	13.3333	23.3333	4.16667	1.66667	5.83333	-1.66667	6.66667	24.1667	1.66667	0.833333	12.5
