# Supplementary material for: Bottom-up and top-down neural signatures of disordered multi-talker speech perception in adults with normal hearing
Source: eLife. 2020 Jan 21;9:e51419. doi: 10.7554/eLife.51419 (PMC6974362; doi:10.7554/eLife.51419)
Supplement: Figure 1—figure supplement 4—source data 1. [file elife-51419-fig1-figsupp4-data1.xlsx]

## Sheet: Sheet1
	S001	S002	S003	S006	S007	S008	S009	S010	S011	S012	S013	S014	S015	S016	S017	S018	S019	S020	S021	S022	S023	S025	S027
Speech-in-Noise measure
Digits threshold (SNR)	3.4898	2.7551	0.918367	1.10204	0	0	5.32653	4.56	0	2.38776	3.67347	6.42857	3.67347	3.4898	0.734694	4.77551	0.734694	0	1.65306	2.02041	4.40816	2.7551	0.918367
Speech intelligibility Questionnaire
SSQ	62.2	55.2	93.6	87.8	90.4	79.4	87.2	78.6	91.2	78.8	58	28	38.6	99	72.8	69.6	81.2	80	73	50.4	76.2	86	91.4
