# Supplementary material for: Bottom-up and top-down neural signatures of disordered multi-talker speech perception in adults with normal hearing
Source: eLife. 2020 Jan 21;9:e51419. doi: 10.7554/eLife.51419 (PMC6974362; doi:10.7554/eLife.51419)
Supplement: Figure 2—figure supplement 1—source data 1. [file elife-51419-fig2-figsupp1-data1.xlsx]

## Sheet: Sheet1
	S001	S002	S003	S006	S007	S008	S009	S010	S011	S012	S013	S014	S015	S016	S017	S018	S019	S020	S021	S022	S023	S025	S027		Mean	STD	SEM	n
(W1-W5)/(W1+W5)
Fz-R	-0.391304	0	0.28	0.416667	0.037037	-0.238095	-0.5	-0.047619	-0.2	0.0526316	-0.217391	5.78241e-17	-0.222222	-0.428571	-0.166667	0.0769231	-0.111111	NaN	0.363636	NaN	0.166667	0.0909091	NaN		-0.050202	0.235848	0.050283	22
Fz-C7	-0.2	-0.2	-0.333333	-0.142857	-0.333333	-0.5	-0.285714	-0.384615	-0.333333	-0.25	-0.285714	-0.0769231	-0.5	-0.166667	-0.185185	-0.454545	-0.714286	NaN	-0.454545	NaN	0.0909091	-0.230769	NaN		-0.298774	0.168594	0.0367902	21
Fz-L	-0.25	0	-0.111111	0	-0.2	-0.333333	-0.333333	0	0	0	-0.428571	-0.333333	-0.4	-0.285714	-0.0666667	0	-0.555556	NaN	0.2	NaN	-0.111111	0	NaN		-0.16867	0.189308	0.0413104	21
