# Supplementary material for: Bottom-up and top-down neural signatures of disordered multi-talker speech perception in adults with normal hearing
Source: eLife. 2020 Jan 21;9:e51419. doi: 10.7554/eLife.51419 (PMC6974362; doi:10.7554/eLife.51419)
Supplement: Figure 2—figure supplement 2—source data 1. [file elife-51419-fig2-figsupp2-data1.xlsx]

## Sheet: Sheet1
	S001	S002	S003	S006	S007	S008	S009	S010	S011	S012	S013	S014	S015	S016	S017	S018	S019	S020	S021	S022	S023	S025	S027
Speech-in-Noise measure
Digits threshold (SNR)	3.4898	2.7551	0.918367	1.10204	0	0	5.32653	4.56	0	2.38776	3.67347	6.42857	3.67347	3.4898	0.734694	4.77551	0.734694	0	1.65306	2.02041	4.40816	2.7551	0.918367
Monaural TFS
FMFR (minmax/halfmax)	32.0601	78.1352	53.7118	35.0291	13.5294	30.2489	87.0246	NaN	41.9159	49.0461	43.5028	61.3315	74.854	135.489	52.0246	47.4708	27.2173	36.6011	70.2122	NaN	101.504	42.5011	79.7142
ERP Measures
N100	-0.020918	-0.015587	-0.010974	-0.022971	-0.015626	-0.004091	-0.009005	-0.00224	-0.010424	-0.01523	-0.01556	-0.019583	-0.003969	-0.015675	-0.004194	-0.007464	-0.014641	-0.008654	-0.013788	NaN	-0.005798	-0.005178	-0.010927
N1P2 Slope	0.0600872	0.0460743	0.0297763	0.0513191	0.5382	0.067402	0.0515364	0.0786082	0.210195	0.55407	0.302566	0.49004	0.0446425	1.1632	0.169217	0.273891	0.184739	0.139504	0.0248782	NaN	0.0702383	0.0811857	0.604612
