# Supplementary material for: Bottom-up and top-down neural signatures of disordered multi-talker speech perception in adults with normal hearing
Source: eLife. 2020 Jan 21;9:e51419. doi: 10.7554/eLife.51419 (PMC6974362; doi:10.7554/eLife.51419)
Supplement: Figure 2—source data 1. [file elife-51419-fig2-data1.xlsx]

## Sheet: Sheet1
	S001	S002	S003	S006	S007	S008	S009	S010	S011	S012	S013	S014	S015	S016	S017	S018	S019	S020	S021	S022	S023	S025	S027
Speech-in-Noise measure
Digits threshold (SNR)	3.4898	2.7551	0.918367	1.10204	0	0	5.32653	4.56	0	2.38776	3.67347	6.42857	3.67347	3.4898	0.734694	4.77551	0.734694	0	1.65306	2.02041	4.40816	2.7551	0.918367
Monaural TFS
FM Detection threshold (Hz)	4.55199	4.10425	3.25255	2.05064	1.77046	2.86493	6.6941	NaN	3.22474	4.89321	5.0285	5.51339	4.37933	6.15638	4.28423	6.09383	2.28014	1.51433	4.11288	NaN	6.62346	3.33	2.87151
FMFR (minmax/halfmax)	32.0601	78.1352	53.7118	35.0291	13.5294	30.2489	87.0246	NaN	41.9159	49.0461	43.5028	61.3315	74.854	135.489	52.0246	47.4708	27.2173	36.6011	70.2122	NaN	101.504	42.5011	79.7142
