# Supplementary material for: Bottom-up and top-down neural signatures of disordered multi-talker speech perception in adults with normal hearing
Source: eLife. 2020 Jan 21;9:e51419. doi: 10.7554/eLife.51419 (PMC6974362; doi:10.7554/eLife.51419)
Supplement: Figure 3—source data 1. [file elife-51419-fig3-data1.xlsx]

## Sheet: Sheet1
	S001	S002	S003	S006	S007	S008	S009	S010	S011	S012	S013	S014	S015	S016	S017	S018	S019	S020	S021	S022	S023	S025	S027
Speech-in-Noise measure
Digits threshold (SNR)	3.4898	2.7551	0.918367	1.10204	0	0	5.32653	4.56	0	2.38776	3.67347	6.42857	3.67347	3.4898	0.734694	4.77551	0.734694	0	1.65306	2.02041	4.40816	2.7551	0.918367
Binaural TFS
IPD detection threshold (Hz)	12.7868	13.5597	10.2821	9.27078	19.5556	15.588	20.5967	18.9819	14.7753	12.8258	7.41663	12.8258	21.6529	18.8388	15.3442	16.6584	10.6675	5.70991	21.3498	NaN	10.2936	7.44984	11.3141
IPDFR (minmax/halfmax)	0.0224401	0.0297507	0.0558549	0.0610143	0.00656338	0.00390418	0.0145054	0.00656543	0.0285945	0.0665205	0.092252	0.0331313	0.0137702	0.0173496	0.00711761	0.0242421	0.0142358	0.0192263	0.0084669	NaN	0.091075	0.0602861	0.0314285
