# Supplementary material for: Bottom-up and top-down neural signatures of disordered multi-talker speech perception in adults with normal hearing
Source: eLife. 2020 Jan 21;9:e51419. doi: 10.7554/eLife.51419 (PMC6974362; doi:10.7554/eLife.51419)
Supplement: Figure 4—figure supplement 1—source data 1. [file elife-51419-fig4-figsupp1-data1.xlsx]

## Sheet: Sheet1
	S001	S002	S003	S006	S007	S008	S009	S010	S011	S012	S013	S014	S015	S016	S017	S018	S019	S020	S021	S022	S023	S025	S027
Speech-in-Noise measure
Digits threshold (SNR)	3.4898	2.7551	0.918367	1.10204	0	0	5.32653	4.56	0	2.38776	3.67347	6.42857	3.67347	3.4898	0.734694	4.77551	0.734694	0	1.65306	2.02041	4.40816	2.7551	0.918367
Pupillometry
Pupil fatigue (slope)	0.00583583	NaN	-0.00253225	-0.0529803	-0.437541	0.503181	-0.835551	0.237389	NaN	NaN	0.46702	-0.303136	-0.135036	-1.79792	NaN	NaN	NaN	-0.45567	-0.30593	NaN	-0.125956	0.969864	-1.14198
