# Supplementary material for: Bottom-up and top-down neural signatures of disordered multi-talker speech perception in adults with normal hearing
Source: eLife. 2020 Jan 21;9:e51419. doi: 10.7554/eLife.51419 (PMC6974362; doi:10.7554/eLife.51419)
Supplement: Figure 5—source data 1. [file elife-51419-fig5-data1.xlsx]

## Sheet: Sheet1
	S001	S002	S003	S006	S007	S008	S009	S010	S011	S012	S013	S014	S015	S016	S017	S018	S019	S020	S021	S022	S023	S025	S027
Speech-in-Noise measure
Digits threshold (SNR)	3.4898	2.7551	0.918367	1.10204	0	0	5.32653	4.56	0	2.38776	3.67347	6.42857	3.67347	3.4898	0.734694	4.77551	0.734694	0	1.65306	2.02041	4.40816	2.7551	0.918367
Peripheral Nerve integrity
ABR wave 1 amplitude	0.07	0.11	0.16	0.17	0.14	0.08	0.05	0.1	0.04	0.1	0.09	0.12	0.07	0.06	0.15	0.07	0.04	0.04	0.15	NaN	0.07	0.06	0.03
Monaural TFS
FMFR (minmax/halfmax)	32.0601	78.1352	53.7118	35.0291	13.5294	30.2489	87.0246	NaN	41.9159	49.0461	43.5028	61.3315	74.854	135.489	52.0246	47.4708	27.2173	36.6011	70.2122	NaN	101.504	42.5011	79.7142
Binaural TFS
IPDFR (minmax/halfmax)	0.0224401	0.0297507	0.0558549	0.0610143	0.00656338	0.00390418	0.0145054	0.00656543	0.0285945	0.0665205	0.092252	0.0331313	0.0137702	0.0173496	0.00711761	0.0242421	0.0142358	0.0192263	0.0084669	NaN	0.091075	0.0602861	0.0314285
Pupillometry
Pupillometry (minmax/halfmax)	0.754017	NaN	0.726656	0.542304	0.52359	0.209574	0.966241	0.382875	NaN	NaN	0.966893	0.859787	0.722766	0.598279	NaN	NaN	NaN	0.474404	0.234645	NaN	0.484133	0.187235	0.328999
